1 **From trend to threat? Assessing the sustainability of wild edible plant foraging by**  
2 **linking local perception to ecological inference**

3

4 **Nicolas J. Giraud** <sup>1,\*</sup>, **Anneleen Kool** <sup>1</sup>, **Pål Karlsen** <sup>2</sup>, **Alexis Annes** <sup>3</sup> and **Irene**  
5 **Teixidor-Toneu** <sup>1,\*</sup>

6 <sup>1</sup> Natural History Museum, University of Oslo, Norway

7 <sup>2</sup> Norges Sopp- og NyttevekstForbund (NSNF), Norway

8 <sup>3</sup> UMR LISST-Dynamiques Rurales, INP-PURPAN, France

9 \*Correspondence: [nicolas-jan.giraud@hotmail.fr](mailto:nicolas-jan.giraud@hotmail.fr) (NJG); [i.t.toneu@nhm.uio.no](mailto:i.t.toneu@nhm.uio.no) (ITT)

10

11 **Abstract**

12 Wild edible plants as culturally-appropriate sources of nutrition and for food security  
13 are now well-recognised. In Europe, the use of wild edible plants is shifting from a  
14 subsistence activity to an emerging trend in high-end gastronomy. The environmental  
15 impacts of this shift are poorly known. Foraging is increasingly popular for personal  
16 consumption and commercially, not least in the Nordic countries where popularity is  
17 fuelled by the New Nordic Food movement. Here, we evaluate if this trend entails  
18 biodiversity conservation risks in Norway. In collaboration with the Norwegian  
19 Association for Mycology and Foraging, we conducted 18 face-to-face interviews with  
20 key stakeholders and we published an online questionnaire filled by 219 recreational  
21 and professional foragers. We enquired on what species are harvested, by whom and  
22 how, where do foragers learn and what are their perspectives on the sustainability of  
23 foraging. We combined these data with an assessment of foraging impact based on  
24 foraging pressure, ecological traits and conservation assessments. Our results show that  
25 272 different wild edible plants are foraged and that this is mostly sustainable.

26 However, some risks arise from the harvest of threatened plants, the potential spread of  
27 invasive species, and the overharvesting of extremely popular or ‘fashionable’ species.  
28 Foraging fosters a strong connection with the natural environment and the majority of  
29 foragers report to forage as part of a sustainable lifestyle. We suggest that careful  
30 encouragement to forage and the participatory development of local guidelines for  
31 sustainable foraging in Norway can enhance people-nature relationships while  
32 safeguarding foraged plant populations.

33

34 **Keywords:** ecosystem services; New Nordic Food movement; plant conservation;  
35 Scandinavia; sustainable livelihoods; wild food

36

## 37 **Introduction**

38 Wild edible plants (WEPs) are plant species collected in the wild to be consumed as  
39 food or drink (Reyes-García et al. 2015). WEPs have always been an integral part of the  
40 human diet around the world (Reyes-García et al. 2015; Bharucha and Pretty 2010).  
41 However, the way humans select, prepare and consume wild edible plants changes over  
42 time. Recent ethnobotanical evidence shows a worrying trend of loss of traditional  
43 ecological knowledge (TEK) of WEPs and associated foraging practices (Łuczaj et al.  
44 2012). Which plants are foraged and how this is done depends on the cultural,  
45 socioeconomic, and ecological contexts. For example, during times of food shortage,  
46 foraging activities often increase (Łuczaj et al. 2012; Łuczaj and Pieroni 2016;  
47 Vorstenbosch et al. 2017). Currently, foraging in and around urban settings is an  
48 emerging practice among city dwellers regardless of age, race, gender, and standard of  
49 living, both in the Global North and the Global South (McLain et al. 2014;  
50 Sardeshpande and Shackleton 2020).

51 Unsurprisingly, WEPs are most well-studied in developing countries where subsistence  
52 lifestyles remain common and wild goods are still part of people's daily lives (Bharucha  
53 and Pretty 2010; Shumsky et al. 2014). In these contexts, wild products are often being  
54 promoted as resources to ensure food security and socio-ecological resilience (Bacchetta  
55 et al. 2016; Beltrame et al. 2019). In Western societies, the role of wild food plants in  
56 sustainable development is being overlooked and ethnobiologists call for efforts to  
57 promote and revitalise these resources (Poe et al. 2014; Sõukand et al. 2021; Ulian et al.  
58 2020). WEPs can contribute directly to improve health, foster local economies, maintain  
59 co-evolutionary relationships with the natural environment, enhance landscape  
60 multifunctionality, and facilitate the integration of migrant communities (Cambecèdes  
61 and Garreta 2017; Poe et al. 2014; Lovrić et al. 2020). While these are valuable benefits  
62 to foster the ongoing transition towards sustainable livelihoods, concerns on  
63 biodiversity conservation are central to the sustainable use of WEPs notably due to the  
64 risk of overharvest (Cambecèdes and Garreta 2017; Redford and Richter 2001).

65 In Europe, although research has been conducted on the documentation of TEK  
66 associated to WEPs use (Pardo-de-Santayana et al. 2010), how foraging practices affect  
67 biological diversity remains poorly known (Cambecèdes and Garreta 2017). Foraging  
68 practices in 21<sup>st</sup> century Europe are grounded in long-standing local traditions but also  
69 in rising innovative culinary approaches (Łuczaj and Pieroni 2016; Reyes-García et al.  
70 2015). The revalorization of WEPs in gastronomic cuisines appeared in the 90s and has  
71 increased since then (Łuczaj and Pieroni 2016). The recent gastronomic revival that  
72 focuses on the significance and use of wild plants has been increasing, especially in the  
73 Nordic countries, where it was triggered by an interest for natural living, alternative  
74 medicine, and eco-friendly products. Specifically, a new focus on WEPs emerged from  
75 the New Nordic Cuisine led by pioneering restaurants such as Noma in Copenhagen or

76 Maaemo in Oslo (Hermansen 2012; Sloan et al. 2015). These new interactions between  
77 foraging traditions and innovations may entail the use of non-traditional plants and new  
78 harvesting techniques. In fact, they may pose new threats on specific plant species,  
79 potentially raising sustainable harvesting and conservation issues.

80 Sustainable harvesting considers that the “resource should be harvested within the limits  
81 of its capacity for self-renewal [... and] the manner of its harvest should be such as not  
82 to degrade the environment in other ways”(Hamilton 2005). Assessing the sustainability  
83 of WEP foraging activity requires an investigation of both social and ecological aspects  
84 that influence these practices. Such an assessment is inherently complex given the high  
85 diversity of actors involved (Pretty 1995), as well as the stakes perceived concerning the  
86 conservation of wild flora (Schulp et al. 2014). Characterising ‘sustainable foraging’  
87 requires understanding the worldviews (i.e. perceptions of their impacts) and  
88 backgrounds (i.e. individual knowledge, experience) that drive foragers’ attitudes and  
89 practices towards the collection of WEPs, as well as understanding the ecological  
90 characteristics of the plants harvested and the environments in which they are harvested.

91 Thus, in order to valorise and promote WEPs in sustainable ways, new ethnoecological,  
92 interdisciplinary, and cross-sectorial conservation approaches are needed (Pardo-de-  
93 Santayana et al. 2010; Ulian et al. 2020).

94 Concomitant to the new Nordic food movements within Scandinavia, there has been a  
95 recent and increasing trend in the commercial use of wild edible plants in Norway. This  
96 study aims to identify potential sustainability challenges of foraging WEPs in Norway  
97 by answering the following research questions: (1) Who is harvesting wild edible plants  
98 in Norway? ; (2) Which plants species are being harvested and why? ; (3) How are  
99 plants being harvested? ; (4) To what extent do local perceptions of sustainable foraging  
100 align with existing ecological and conservation data of harvested plants? To do so, we

101 study the emergence of new socio-economic trends of WEP harvest, the ethnobotanical  
102 diversity harvested and link local ecological knowledge and perceptions of sustainable  
103 foraging with sustainability inferences based on a dataset of ecological traits of the  
104 harvested plants. With the Norwegian Association for Mycology and Foraging (*Norges*  
105 *Sopp- og NyttevekstForbund*, NSNF), we investigated foraging practices and place them  
106 in perspective with the ecological characteristics of harvested plants. Ultimately, the  
107 goal is to establish context-specific sustainable foraging guidelines in Norway through a  
108 knowledge-exchange process with the foraging community.

109

## 110 **Materials and Methods**

111 This research was conducted from April to October 2020 as part of an interdisciplinary  
112 research partnership between the Natural History Museum of Oslo (NHM), UMR  
113 LISST-Dynamiques Rurales, and the NSNF. Research was grounded in a participatory  
114 and community-based approach to ensure ownership of these guidelines by the foraging  
115 community. The study was co-designed with NSNF representatives and conducted in  
116 four phases: (1) Topic exploration, (2) Ethnoecological data collection, (3)  
117 Ethnoecological data analysis, and (4) Sustainability inference. The Code of Ethics of  
118 the International Society of Ethnobiology (2008) was followed and approval from the  
119 Norwegian Center for Research Data, *Norsk Senter For Forskningsdata* (NSD), was  
120 granted (Reference number 157596).

121 First, preliminary unstructured interviews were conducted with five key informants  
122 including the NSNF association leader, three professional foragers and one conservation  
123 expert in May and June 2020 to explore Norwegian WEP foraging practices, past and  
124 present. The research context was presented to each informant prior to commencing the  
125 interview. Free prior informed consent (FPIC) was obtained verbally before each

126 interview. Foragers were then asked about their experience and thoughts on foraging  
127 sustainability. This method was chosen to allow the informants to bring their own  
128 thoughts and opinions to further identify relevant and recurring themes (Albuquerque et  
129 al. 2019). In August 2020, participant observation during WEP forays and informal  
130 discussions with professional and non-professional foragers completed this preliminary  
131 exploration of perceptions, values, and practices associated to WEPs (Cunningham  
132 2001). This helped outline local expert knowledge and build trusting relationships.  
133 Second, primary ethnobotanical data was collected via face-to-face interviews and an  
134 online questionnaire with Norwegian recreational and professional foragers, including  
135 members of the Nordic food movement. A forager was defined broadly as a person who  
136 spends time outdoors to gather WEPs. The questionnaire allowed gathering information  
137 across the country at a time where travelling was discouraged due to the covid-19  
138 pandemic.

139 Building on the initial five interviews and the online questionnaires, snowball and  
140 convenience sampling methods (Bernard 2011) were used to identify expert foragers  
141 and cooks within the Norwegian foraging community. NJG and PK conducted field  
142 trips to meet foragers and attend workshops and workdays in order to conduct  
143 interviews (Figure 1). These 18 interviews provided in-situ observation of different  
144 landscapes and WEPs as well as a diversity of local perceptions on WEPs distribution  
145 and availability that would have been impossible to obtain from an online questionnaire  
146 alone. Free prior informed consent (FPIC) was obtained in writing before each  
147 interview.

148 <Figure 1>

149 In parallel, an online questionnaire was used to collect a comprehensive list of harvested  
150 WEP species, practices, and sustainability perceptions from a larger number of foragers

151 to complement the detailed qualitative data provided during face-to-face interviews  
152 (Table S1). The complete questionnaire consisted of three sections based on key themes  
153 on WEP foraging identified during the exploratory interviews. After a brief introduction  
154 to the research, the first section asked questions related to the practices used by foragers  
155 to harvest plants as well as the knowledge of WEPs held by foragers. Listing and  
156 multiple-choice questions were used for these questions and respondents also had the  
157 opportunity to add comments. Lists of foraged WEPs were compiled per botanical plant  
158 part harvested (e.g. berries, flowers, leaves). No minimum nor maximum were imposed  
159 to fill these lists. The second section asked about individual perceptions and values  
160 associated with foraging WEPs using Likert scale statements (e.g. “foraging contributes  
161 to our sense of community”). In the final section, respondents were asked to provide  
162 non-personal, socio-demographic data such as the foragers’ type (professional and/or  
163 recreational), membership of an association such as NSNF, respondents’ subjective  
164 experiences (e.g. perception of foraging impact) and self-assessed knowledge (i.e.  
165 perceived ‘cultural expertise’).

166 The questionnaire was available in English and Norwegian for one month between June  
167 and July 2020 on *Nettskjema*, the University of Oslo tool for creating and handling  
168 online surveys and data. The questionnaire was distributed through various social media  
169 platforms as well as via the social networks of some key informants. It was published  
170 on the NHM’s website, as well as the NSNF’s June’s newsletter and distributed through  
171 the NSNF mailing list. The questionnaire was anonymous and had no time limit for  
172 completion.

173 Three datasets were created as a means to analyse responses gathered from interviews  
174 and the online questionnaire: (1) A floristic dataset with the list of WEPs mentioned in  
175 the online questionnaire; (2) A dataset with the socio-ecological categorical variables

176 coded from the online questionnaire used for qualitative and quantitative statistical  
177 analysis; (3) A matrix of qualitative data collected during face-to-face interviews.  
178 The floristic dataset was organised per plant species and consisted of each plant's  
179 scientific name, botanical family, the most commonly used folk names, number of  
180 reports per plant part, total number of reports (NRs), Norwegian Red List of Species  
181 status (IUCN classification of plant species in Norway; Henriksen and Hilmo 2015),  
182 invasiveness, perennation, life form, woodiness, clonality, comments on ecology  
183 (sourced from BSBI 2021), and comments from respondents of the online questionnaire  
184 on conservation issues, if any. Most plants were originally mentioned on the online  
185 questionnaire through their folk or local names. The vernacular names provided were  
186 cross-referenced with scientific literature to accurately count the number of reports of  
187 each plant species identified (Henriksen and Hilmo 2015; Høeg 1974). Species that  
188 were not identifiable via these sources were discussed within the research team and  
189 identified when possible. If species-level identification was not possible, taxa were  
190 identified at genus level. The resulting scientific nomenclature and plant families were  
191 checked against The Catalogue of Life (Roskov et al. 2019). to update to current  
192 botanical accepted names. XLSTAT was used to count the total number of different  
193 plant species listed by respondents (Plant Reports per respondent, PR), as well as the  
194 number of times plant species were cited (Number of Reports per plant species, NR).  
195 The cultural importance of WEPs was evaluated through their gathering frequency, i.e.  
196 the number of respondents foraging each species. Foraged plants cited in online  
197 questionnaires were processed as free-lists and the salience index calculated to infer the  
198 cultural importance of each plant. From each botanical part list, salience per species was  
199 calculated with the R package AnthroTools (Purzycki and Jamieson-Lane 2016) in  
200 RStudio (2021). Together with NR, salience calculations per plant part were used to



201 explore the importance of WEPs and to assess to what extent they might be vulnerable  
202 in relation to the plant parts being foraged.

203 A second dataset based on qualitative responses to the online questionnaires was built  
204 where the units of analysis were the respondents. Categorical and quantitative variables  
205 were coded to allow for analysis on XLSTAT. Descriptive statistics were used to  
206 summarise the data gathered from the questionnaire. The mean and standard deviation  
207 of the number of plants listed by respondents in the questionnaire were calculated across  
208 types of foragers (professional or recreational, and association members or non-  
209 members). Expertise levels were compared between professionals and recreational  
210 foragers, and between members and non-members, through the Mann-Whitney test  
211 (because  $n < 30$ ), using the difference in the total number of plant reports elicited by  
212 these groups of foragers. A Fisher test was conducted to evaluate the consensus for the  
213 perceived impact of foraging on biodiversity and between types of foragers  
214 (professional or recreational, association member or non-member), including self-  
215 assessed expertise.

216 A third dataset gathered qualitative information from twelve face-to-face interviews  
217 with key informants were recorded and transcribed using the open-source software  
218 OTTER. Audio and transcripts were deleted from the online software after analysis to  
219 ensure data protection. Personal data were anonymized using codes instead of names in  
220 any paper or electronic document. A key linking names with codes was written on paper  
221 and kept locked in a cabinet at the Natural History Museum (University of Oslo). Seven  
222 other interviews were conducted in contexts with little opportunity to obtain a good  
223 quality audio recording and were not recorded. Instead, notes were taken and  
224 transcribed in a word document. Transcriptions and notes were analysed with theme  
225 colour-coding. Emergent themes were extracted from transcripts as variables in an

226 Excel file. Relevant and interesting quotes illustrating these themes were noted down to  
227 support the qualitative analysis.

228 An assessment of the impact of foraging on WEPs conservation was conducted to  
229 identify potentially vulnerable WEPs and risks in relation to foraging activities. We  
230 developed a sustainability index linking ecological (i.e. life cycle and reproduction  
231 traits: perennation, life form, woodiness, clonality) and conservation information (IUCN  
232 status in Norway, see Henriksen and Hilmo 2015) with foraging data collected from the  
233 online questionnaires. The total number of plant reports per species (NRs) was used as a  
234 proxy for foraging pressure. Together with salience calculations for each botanical plant  
235 part, this enabled the identification of two potential conservation concerns: the risk of  
236 overharvesting native species and the risk of dispersing invasive foraged species.

237 These data were used to categorize each species with regards to potential sustainability  
238 impact under the current foraging pressure (Figure 2). Impact was defined and assessed  
239 differently depending on whether a plant was native (risk of extinction through  
240 overexploitation) or alien (risk of invasion through spread). With separate assessments  
241 for native and alien plants, WEPs were scored from green (G; no or little risk; with a  
242 nuanced assessment G\*, indicating that exceptions to the main category may exist),  
243 orange (O; potential risk), and red (R; high risk). When a species was red-listed and  
244 being foraged it was directly indexed in the red category. If not red listed, our  
245 assessment depended on the plant parts that are collected and the harvesting pressure  
246 proxied from the popularity of each WEPs.

247 <Figure 2>

248

## 249 **Results**

250 *Foraging wild edible plants in Norway*

251 The online questionnaire was filled by 219 foragers (Figure S1) who collectively forage  
252 all across Norway (Figure 1). Of them, 207 foragers (94,5%) considered themselves as  
253 recreational and 11 (5%) forage professionally. Yet, most of those who forage  
254 professionally also had another job on the side. The professional foraging milieu in  
255 Norway is small, and our participatory approach ensured that we reached most  
256 professional foragers across Norway (Figure 1). According to the online survey, most  
257 recreational foragers are older than 50 years old, very few people under 30 forage, and  
258 most professionals are between 30 and 50 years old (Figure S1). Fifty-eight percent of  
259 the recreational and 95% of professional foragers are members of an association such as  
260 the NSNF.

261 Most foragers both gather, process and consume wild plants (online questionnaire,  
262 >96%). Other than food, foragers gather wild plants for their ornamental value (68% of  
263 online questionnaire respondents harvest plants for their ornamental value) and their  
264 medicinal properties (31%). During the foraging season (May to October), 3% go  
265 foraging every day, whereas almost 40% forage regularly one to three times a week.  
266 Around 25% gather WEPs between one and three times every two weeks and another  
267 25% once a month. Most foragers (>91%) consume WEPs at least once a month. While  
268 most foragers only harvest WEPs from the wild, almost 40% of respondents mentioned  
269 either transplanting WEPs from the wild to their own garden (31%) and/or tending  
270 WEPs directly in situ (8%).

271

### 272 *Ethnoecological knowledge of Norwegian foragers about wild edible plants*

273 Professionals reported more plant taxa on average than recreational foragers (49 and 15  
274 plants, respectively), which suggests that they have more knowledge in the domain of  
275 foraging (Mann-Whitney test, p-value<0.001). These estimations based on the number

276 of plants mentioned per respondent correlate with responses about self-assessed  
277 knowledge. While professional foragers forage often (varying from every day during  
278 high season to 1-3 times every two weeks in low season), so do many recreational  
279 foragers. Members of foraging associations reported significantly more plant taxa on  
280 average than people who forage but are not members of such associations (20 and 11  
281 plant taxa respectively, Mann-Whitney test,  $p$ -value $<0.05$ ). Most respondents reported  
282 learning by themselves (78.5%), through literature and a personal practice of foraging.  
283 About two thirds (69%) learn from family and 36.5% from friends. Formal education  
284 such as courses and workshops are also an important source of knowledge for 16% of  
285 respondents. No significant relationship was found between types of foragers (i.e.  
286 recreational or professional foragers) and the learning modes (i.e. personal, family, or  
287 education-based sources of knowledge).

288

### 289 *The wild edible plants foraged in Norway*

290 A total of 272 taxa of wild edible plants belonging to 67 botanical families were  
291 identified at species or genus level from 3647 reports (NR), gathered from the online  
292 questionnaires. Seven families had high NRs and constituted 65% of the total NRs. The  
293 families with the highest number of reported species are Rosaceae with 29 taxa (10.5%)  
294 and Asteraceae with 27 taxa (<10%). Apiaceae and Brassicaceae were represented by  
295 18 taxa each (6.5%), followed by Lamiaceae (5.8%; 16 taxa), Fabaceae (4.7%; 13 taxa),  
296 and Ericaceae (4%; 11 taxa). The remaining 60 families were represented by less than 8  
297 taxa each (<3%).

298 According to the number of reports, the most popular WEPs foraged in Norway are  
299 *Vaccinium myrtillus* L. (208 reports), *Rubus idaeus* L. (165 reports), *Chamaenerion*  
300 *angustifolium* (L.) Schur (157 reports), *Taraxacum* sp. (155 reports), *Vaccinium vitis-*

301 *idaea* L. (150 reports), *Allium ursinum* L. (145 reports), *Urtica dioica* L. (144 reports),  
302 *Rubus chamaemorus* L. (122 reports), *Fragaria vesca* L. (104 reports), *Sorbus*  
303 *aucuparia* L. (101 reports), and *Filipendula ulmaria* (L.) Maxim. (100 reports). The  
304 remaining 263 taxa have fewer than 90 citations each and 124 taxa are only cited by one  
305 or two respondents. Fruits and berries were collected by 216 respondents, 188  
306 respondents reported collecting leaves, and 160 respondents reported collecting flowers  
307 (Table 1). Of the 272 taxa, 95 are assumed to be introduced to Norway, either recently  
308 or in a distant past, while the original origin of a further four taxa is unknown  
309 (Artsdatabanken, 2020; Henriksen & Hilmo, 2015). A total of 137 foraged taxa is  
310 assumed to be native (Table S2).

311

312 <Table 1>

313

314 *Foraging motivations and trends: from necessity to recreation and human-nature*  
315 *connection*

316 Traditionally, foraging was “driven by necessity” and done in combination with  
317 farming, hunting, or fishing, as explained by the foragers and experts interviewed face-  
318 to-face. The concept of *matauk* literally means ‘food increase’ (from Norwegian *mat* =  
319 food and *auk* = increase). It refers to a traditional practice of subsistence lifestyles,  
320 which was common in Norwegian households in the past, before the major industrial  
321 and green revolutions. People would complement their food sources from small-scale  
322 farming, through *matauk* activities that were mostly done in the wild but not  
323 exclusively. *Matauk* mostly refers to hunting and fishing activities that are famously  
324 embedded within the Norwegian culture, but also to growing vegetables in the garden,  
325 or going out in the forest for a ‘mushroom hunt’ or ‘berry picking’. Foraging WEPs

326 though, apart from berries and very common plants such as nettles, *brennesle* (*Urtica*  
327 *dioica*), is not part of the *matauk* tradition. As a subsistence activity, *matauk* also fulfils  
328 certain economic and nutritional goals, especially because the idea of *matauk* was to  
329 collect and store nutritious summer foods for the long and dark winter.

330 Most interviewees explained that the practice of *matauk* is in decline. The need to store  
331 wild foods decreased and subsequently disappeared following the industrial and green  
332 revolutions. Foraging became much more a means to enjoy the *friluftsliv* (from fri =  
333 free, luft = air-outdoors, and liv = lifestyle) or the famous Nordic outdoors lifestyle.

334 Similarly, based on interviews, from gathering to processing, cooking, and eating  
335 WEPs; having a ‘goal’ with foraging activities, seems to motivate the use of WEPs by  
336 foragers. On the one hand, foragers enjoy the ‘hunt’ and the sense of freedom, as well as  
337 the nutritional and gastronomic rewards. This is particularly reflected in the value  
338 assigned to the knowledge required to forage for one’s own food. On the other hand,  
339 chefs use WEPs within their cuisines as a way to express their Nordic identity while  
340 telling a story of Scandinavian culture. According to most foragers and chefs,  
341 integrating wild food plants in their cooking is a way to express their ‘freedom’ as part  
342 of their ‘lifestyles’ and their identity. They feel free in developing a strong connection  
343 with the natural environment in which they act, and they are looking for something  
344 ‘different’ than what the societal norm has to offer. For most of them, foraging and  
345 cooking WEPs is a way to ‘relocalize’ and put all their energy into something  
346 ‘meaningful’ that makes sense not only at a local level, but also at a global scale.

347 ‘Knowledge sharing’ about these ‘lifestyles’ is as important as being able to live a ‘free  
348 life’, thereby showing the world that another way is possible.

349

350 *Local perceptions of sustainable WEPs foraging*

351 Respondents of online questionnaires and those interviewed face-to-face have different  
352 interpretations of what sustainability means. Some participants define sustainability in  
353 relation to the direct impact foraging has on plant communities, others in relation to the  
354 larger effect the foraging lifestyle has on society. Despite these different interpretations,  
355 most people believe that foraging is or can be sustainable. The majority of respondents  
356 of the online questionnaire (90.5%) agree that some WEPs are more vulnerable than  
357 others, and therefore deserve specific foraging practices. Even though most people  
358 (75%) agree that foraging WEPs is a sustainable activity, there was less agreement as to  
359 whether foraging WEPs might be unsustainable in some cases. While 50% agree to  
360 some extent, 21% have no opinion and almost 24% disagree. Respondents who believe  
361 that foraging is potentially ‘unsustainable’ also mentioned that some ‘plants are more  
362 vulnerable than others’ (Factorial analysis, correlation coefficient 0.262; p-value<0.05).  
363 Younger people are more likely than older people to think that foraging might be  
364 unsustainable (Factorial analysis, correlation coefficient -0.134; p-value<0.05). Regular  
365 foragers (i.e. people foraging one to three times a week) believe that foraging is a  
366 sustainable activity (0.203; p-value<0.05).  
367 Informants interviewed face-to-face (n=18) were adamant that foraging is not a major  
368 threat to biodiversity, yet they also mentioned that some conservation issues may arise  
369 at a local scale. The decline of WEPs in Norway was also reported in the online  
370 questionnaire, and overharvesting may happen locally for some species (e.g. wild garlic,  
371 *ramsløk*, *Allium ursinum*) in densely populated areas. Thirty-nine observations on the  
372 local decline of this species were reported in the online questionnaire and the *ramsløk*  
373 case was mentioned in each and every interview. Ostrich fern, *strutseving* (*Matteuccia*  
374 *struthiopteris* (L.) Tod.; 24 mentions in online questionnaires), and sea kale, *strandkål*

375 (*Crambe maritima* L.; eight mentions in online questionnaires), also seem to be  
376 ‘fashionable’ plants on which an increased foraging pressure may occur locally.  
377 In terms of harvesting quantity, most informants self-reported being guided by  
378 ‘common sense’ and referred to those that over-exploit resources as ‘greedy’. However,  
379 the concept of sustainable harvesting remains vague and subjective, and illustrates the  
380 little available information on foraging best practices. Indeed, only half of respondents  
381 were aware of regulations written in law such as not being allowed to collect plants in  
382 nature reserves. Interestingly, the *molte* rule that was written in law (Statsforvaltaren i  
383 Troms og Finnmark 2019) remains a powerful feature of the foragers’ common sense  
384 and they do sometimes apply it to other edible plants. It states that people are free to  
385 forage unless the landowner has put up a sign that it is not allowed, but even then  
386 berries can be picked if they are consumed on site and the landowner is obliged to pick  
387 the berries him- or herself and not let them rot on the ground. However, aspects of this  
388 rule are interpreted subjectively by different foragers. For instance, one guideline states  
389 that “one should not collect more than a third of what is on site”, which is problematic if  
390 several foragers visit the same site. Also, only 20% of online respondents could recall  
391 exact harvesting volumes, and those that did reported a wide range of weights  
392 unspecific to any listed WEPs.

393

#### 394 *Sustainability assessment of foraging in Norway based on WEPs ecological traits*

395 The sustainability assessment shows that some important WEPs may be vulnerable to  
396 foraging activity. We did not observe any differences between recreational foragers and  
397 professionals regarding the conservation risks of the species they forage, and the  
398 pressure they could put on vulnerable species. No conservation risks were observed for  
399 the vast majority of foraged species (216 in G and 46 in G\*; >95%), but conservation



400 risks exist for ten plants (O, R, and R\*) of which seven are native and three are alien  
401 (Tables 2, 3). Four native species were scored red (R). These are rarely harvested (Table  
402 3) but the fact that they were mentioned in the questionnaire justifies attention as they  
403 are classified in the Norwegian Red List, either as vulnerable or near threatened. *Malus*  
404 *sylvestris* (L.) Mill. (scored R\*) is rare and most likely foragers harvest the fruits of  
405 hybrid species, yet the fact that real *M. sylvestris* is difficult to identify puts it at risk.  
406 *Allium ursinum* was scored orange because, even though no conservation concerns exist  
407 for the species in Norway as a whole, our participants reported local overharvest, a trend  
408 which has also been discussed in Norwegian media (Statsforvaltaren i Troms og  
409 Finnmark 2019). A large fraction of foraged taxa (95 out of 272) was either introduced  
410 long ago during the introduction of agriculture, during the Middle Ages or as garden- or  
411 agricultural plants during the past 400 years.

412 <Table 2>

413 <Table 3>

414 Some species are very commonly harvested and foraging may be damaging to the  
415 plant's survival when roots, stems, or seeds are removed including *Angelica*  
416 *archangelica* (NR 35), *Carum carvi* L. (NR 51), scored G\* (Table S2). The collection  
417 of the berries of *Rubus chamaemorus* is very popular (NR 121), and regulations exist  
418 for this specific plant. Also scored G\* were plants where species-level identification  
419 was challenging. This included the genera *Cirsium* sp., *Artemisia* sp., *Viola* sp.,  
420 *Myosotis* sp., *Salicornia* sp., *Dianthus* sp., *Trifolium* sp., *Vicia* sp., *Geranium* sp.,  
421 *Thymus* sp., *Epilobium* sp., *Euphrasia* sp., *Papaver* sp., *Rumex* sp., *Primula* sp.,  
422 *Alchemilla* sp., *Rosa* sp., and *Rubus* sp. Except for *Viola* sp. (NR 37), these are currently  
423 not popular WEPs and harvesting pressure is low, but foragers may be harvesting a  
424 threatened species unknowingly (Table S2). Foraging roots (e.g., *Arctium lappa*, which

425 was introduced before 1800 and *Rhodiola rosea* L.), bark (e.g., *Picea abies* (L.) H.  
426 Karst. and *Pinus sylvestris* L.) and sap (e.g., *Betula pendula* Roth.) can be highly  
427 detrimental to individual plants and plant communities (G\*; Table S2). These foraging  
428 practices are sustainable when local knowledge exists to ensure that a specimen's bark  
429 or sap is not too heavily foraged or that the removal of individuals to harvest their roots  
430 does not compromise the health of the plant community. Many alien species foraged for  
431 their leaves were also scored as G\*, since foraging practices could potentially contribute  
432 to sustainability through removal of invasive plants.

433

## 434 **Discussion**

435 *The emergence of a professional foraging activity within the “back to the land” trend*  
436 Echoing wider European trends of WEPs use (Grasser et al. 2012; Łuczaj and Pieroni  
437 2016), foraging appears to be shifting from a survival to recreational activity in Norway.  
438 This shift is reflected as the cultural transition from *matauk* to *friluftsliv*. A parallel  
439 trend can be seen in the movement from non-commercial to professional foraging in  
440 Norway. Many values associated to the foraging activity remain grounded in Norwegian  
441 history and traditions, yet this practice is also subject to new socio-ecological context  
442 that is altering the motivations and attitudes behind foraging. The modernization of  
443 lifestyles, arising from the industrial and green revolutions, appears as the main driver  
444 for the declining necessity and use of wild foods in general (Łuczaj and Pieroni 2016;  
445 Vandebroek and Balick 2012). Evolving nutritional needs and diets have changed  
446 societal motivations for going outdoors to gather foods from the ‘wild’ (Reyes-García et  
447 al. 2015; Łuczaj et al. 2012; Turner et al. 2011). As observed elsewhere in Europe (e.g.,  
448 Pardo-de-Santayana et al 2010; Reyes-García et al. 2015), this study found that  
449 Norwegian foragers and chefs appreciate WEPs for their culinary value, and as a

450 symbol of independence from a standardized and globalized food system. Foraging has  
451 become a cultural feature or means for achieving the goal of feeling free, and a way to  
452 foster local identities as most clearly expressed through the New Nordic food  
453 movements (Hermansen 2012). In Norway, foraging is seen as a feature of a sustainable  
454 lifestyle, where the many benefits of WEPs are used and valued as symbols of freedom,  
455 alternative culture and eco-friendly lifestyles in opposition to modern lifestyles (Turner  
456 et al. 2011). Foraging WEPs provides a sense of place and a true connection with nature  
457 within a ‘glocal’ landscape (Stano, 2018) potentially triggering foragers to act as local  
458 ecological stewards (Waygood 2019).

459

460 *Is foraging in Norway sustainable?*

461 In this study, 272 taxa were reported as being used as foods, more than three times the  
462 number reported by Schulp et al. (2014) from a synthesis of ecosystem services  
463 provided by vascular plants used as wild foods in Europe. Our results show that there  
464 are no conservation issues for most foraged species yet attention should be paid to  
465 specific practices and some red-listed plants, a trend observed elsewhere (Landor-  
466 Yamagata et al. 2018; O’Neill et al. 2017; Teixidor-Toneu et al. 2021). Here, some  
467 sustainability issues have been identified including (1) botanical identification  
468 challenges, (2) potentially damaging foraging practices, (3) the emergence of  
469 ‘fashionable’ WEPs that might be overharvested locally, and (4) the spread of alien and  
470 potentially invasive species. Based on our interviews, we also show that local ecological  
471 knowledge enables foragers to harvest a wide variety of plants at different times of the  
472 year, hence reducing localized pressures on fashionable species. The fact that regular  
473 and professional foragers know more about a larger number of edible plant species

474 shows the potential for foraging becoming more sustainable when people forage more,  
475 not less.

476 Vernacular taxonomies do not completely match botanical ones (Berlin 1973, 1992).  
477 Here we observe that some WEPs are not identified at species level by non-botanists  
478 and they refer to genera that include red-listed species. This issue can be addressed  
479 through training programmes for foragers given by associations such as the NSNF.

480 The majority of WEPs reported in this study were harvested as berries, leaves, and  
481 flowers. The limited harvesting of roots and bark appears to confirm Turner et al. (2011)  
482 who suggest that the physical, visual, and cognitive access to WEPs determines the  
483 likelihood of a plant being harvested, but also because it is less destructive and less  
484 time-consuming. The collection of bark, sap and underground organs can significantly  
485 damage the individual or destroy it completely (Hamilton 2005; Mathismoen 2020). In  
486 Norway, these are not the most popular harvests, but they are common enough and part  
487 of the Norwegian tradition (Teixidor-Toneu et al. 2020). The digging of roots is  
488 probably less common today than in the past, a trend also observed in the British Isles  
489 (Łuczaj et al. 2021). We observed that, under the label of ‘common sense’, local  
490 knowledge exists to guide foragers’ decisions on how much to harvest from one tree or  
491 population.

492 Locally sourced and available, low-input, free, non-cultivated, fresh, and nutritious  
493 WEPs are valuable natural resources considered and promoted as sustainable  
494 ingredients by high-end gastronomic restaurants that aim at doing “Nordic” with  
495 “multicultural influences” (Byrkjeflot et al. 2013; Hermansen 2012; Mithril et al. 2012).  
496 Acknowledged by the local media (Mathismoen 2020), some edible plants have shifted  
497 from neglected to popular. ‘Fashionable’ edible plants can be overharvested in some  
498 localities, primarily in and around densely populated areas in Norway, where they are

499 easily found and recognized for an increasing number of gatherers. The wild garlic  
500 (*Allium ursinum*) example best showcases this (Mathismoen 2020).

501 While the use of invasive alien plant species may appear to be a positive aspect of  
502 foraging WEPs as harvesting may contribute to eliminating the plant, great care on  
503 harvesting procedures should be taken in order not to spread it across the landscape.  
504 Promoting the harvest and consumption of invasive plants may help create new  
505 traditions and markets and ultimately encourage the preservation of these species  
506 (Nuñez et al. 2012), but well-educated foragers can contribute to the control of invasive  
507 aliens. Invasive aliens foraged for their berries or seeds should be transported properly  
508 in closed bags and leftovers should not be composted. For those alien species that can  
509 spread vegetatively, it is also important to not lose them on the way and not to compost  
510 them (Filippi and Aronson 2011).

511 Local ecological knowledge about foraging sustainability is labelled by Norwegian  
512 foragers as ‘common sense’. As in other places (e.g., North America; Turner et al.  
513 2011), foragers’ attitudes are framed within cultural appreciation, societal regulations,  
514 and personal ethical considerations. In Norway, such ‘common sense’ primarily referred  
515 to the quantity of WEPs harvested, and the quality or care taken in foraging practices.  
516 Being careful to not trample soil, considering plant ecology and community structure, or  
517 ‘leaving some foods for other living-beings’ are general considerations amongst the  
518 foraging community in Norway and elsewhere (Hamilton 2005). Overall, there is very  
519 little concern for a major negative impact of foraging of WEPs in Norway, while an  
520 increased awareness of the use potential of WEPs is likely to have a positive impact on  
521 their conservation.

522 Foraging can facilitate respectful relationships between humans and nature, especially  
523 in urban environments (Landor-Yamagata et al. 2018) thereby contributing to nature

524 conservation in general. Rules such as the *molte*-rule showcase the moral value of  
525 WEPs and foraging. However, more technical guidelines could be useful for supporting  
526 the sustainability of foraging in Norway, as has been done in France with the French  
527 association of foraging and wild plant professionals (Cambecèdes and Garreta 2017;  
528 Chaber et al. 2013). In Norway, recreational foragers have legal freedom almost  
529 anywhere to pick WEPs for their own uses. Unlike recreational foragers, professionals  
530 have no legal rights and they should ask for land owners permission even for the  
531 smallest harvest. Yet, professional foragers are the ones who are more likely to harvest  
532 sustainably given their larger ecological knowledge and they have a key role to play in  
533 educating the recreational foraging community. Interviewees called for more efforts in  
534 connecting people all along the wild food chain in order to share their knowledge about  
535 the land and wild edibles, about their ‘sustainable’ lifestyles, and the practices that  
536 underlie their activity. Because their activity is not legalized but accepted only by  
537 common practice, they claim the need to work for a framework where commercial  
538 foraging can be more easily predictable and organized, but not restrictive. Show-casing  
539 this desire, some professionals already organized gathering workshops with chefs.  
540 Following the New Nordic food movements, discussing the responsible promotion of  
541 foraging and associated ‘best practices’ appears as the missing link towards a  
542 sustainable ‘Wild Food System’ in Norway (Hermansen 2012; Mithril et al. 2012).

543

## 544 **Conclusions**

545 The results of this research indicate that, overall, current foraging activities of wild  
546 edible plants in Norway is not generating negative environmental impacts and is rather  
547 contributing to an increased appreciation and hence conservation of natural ecosystems.  
548 However, both recreational and professional foraging activity may pose certain risks

549 locally or in the future and hence there is a need for greater guidance on sustainable  
550 harvesting practices for all stakeholders.

551 Despite foraging being perceived by many practitioners as part of a sustainable lifestyle,  
552 the increased popularity of this activity is beginning to cause localized overharvesting  
553 pressures in and around urban centres and can contribute to the spread of invasive alien  
554 edible species. Some foraging practices are destructive and should be limited.

555 Moreover, some botanical identification issues exist that could lead to the harvest of  
556 threatened species.

557 These issues can be avoided through maintaining and promoting both local and  
558 scientific knowledge and cultural expertise amongst the foraging community. This can  
559 be achieved through sharing information on sustainable harvesting practices and  
560 promoting knowledge exchange amongst local key stakeholders within the Norwegian  
561 foraging community including recreational foragers, professional foragers, and chefs.

562 The recent ‘fashionable’ interest surrounding wild food plants offers a great opportunity  
563 for bringing together the Norwegian foraging community to co-create a common vision  
564 and outline clear guidelines to support and promote sustainable foraging in Norway.

565

## 566 **Acknowledgments**

567 This project would not have been possible without the Nordic People and Plants  
568 research group. Thanks to the Norwegian foraging community for their hospitality,  
569 generosity, and willingness to contribute to this work. We also thank the EDGE group  
570 at NHM, especially Maria Ariza Salazar and Margret Veltman for great constructive  
571 feedback, and Luka N. Olsen, Anna Olszewska, Mari H. Knapstad, and Ina T. Winther  
572 for the enormous job done in translating our datasets from Norwegian to English.

573 Special thanks to Anna Marie Nicolaysen for her support during the research process, as

574 well as the INP-PURPAN International Relation Office that contributed to this  
575 interdisciplinary collaboration to happen. We are also grateful to Eddard Colbert whose  
576 talented academic writing style made it easier to finalize the document.

577 This research was funded by the SAMKUL program of the Research Council of  
578 Norway (project number 283364). NJG was also awarded by a NMBU BIOVIT small-  
579 grant funding (Småforsk) as well as an ERASMUS+ and a DGER grand provided by  
580 the French Ministry of Agriculture for this project.

581

## 582 **References**

583 Albuquerque UP, Nascimento ALB, Soldati GT, Feitosa IS, Campos JLA, Hurrell JA,  
584 Hanazaki N, de Medeiros PM, da Silva RRV, Ludwinsky RH, Junior WSF, Reyes-  
585 García V (2019) Ten important questions/issues for ethnobotanical research. *Acta Bot*  
586 *Bras* 33:376–385. DOI 10.1590/0102-33062018abb0331

587 Artsdatabanken - Norwegian Biodiversity Information Centre: Alien species (2020)  
588 Available online: <https://www.biodiversity.no/alien-species-2018?Key=1459943820>  
589 (accessed on 20 July 2021)

590 Bacchetta L, Visioli F, Cappelli G, Caruso E, Martin G, Nemeth E, Bacchetta G, Bedini  
591 G, Wezel A, van Asseldonk T, van Raamsdonk L, Mariani F (2016) A manifesto for the  
592 valorization of wild edible plants. *J. Ethnopharmacol* 191:180–187. DOI  
593 10.1016/j.jep.2016.05.061

594 Beltrame D, Gee E, Güner B, Lauridsen NO, Samarasinghe WLG, Wasike VW, Hunter  
595 D, Borelli T (2019) Mainstreaming biodiversity for food and nutrition into policies and  
596 practices: Methodologies and lessons learned from four countries. *J AARI* 29:25–38.  
597 DOI 10.18615/anadolu.568795



- 598 Berlin B (1973) Folk systematics in relation to biological classification and  
599 nomenclature. *Annu Rev Ecol Syst* 4:259–271. DOI  
600 10.1146/annurev.es.04.110173.001355
- 601 Berlin B (1992) *Ethnobiological classification: Principles of categorization of plants  
602 and animals in traditional societies*, Princeton University Press, Princeton
- 603 Bernard HR (2011) *Research methods in anthropology: Qualitative and quantitative  
604 approaches*, Altamira Press, Plymouth, UK
- 605 Bharucha Z, Pretty J (2010) The roles and values of wild foods in agricultural systems.  
606 *Philos Trans R Soc B Biol Sci* 365(1554):2913–2926. DOI 10.1098/rstb.2010.0123
- 607 Botanical Society of Britain and Ireland (2021) *Biological records centre: Online atlas  
608 of the British and Irish Flora*. Available online: <https://www.brc.ac.uk/plantatlas/>  
609 (accessed on 20 July 2021)
- 610 Byrkjeflot H, Strandgaard Pedersen J, Svejenova S (2013) From label to practice: The  
611 process of creating New Nordic Cuisine. *J Culin Sci Technol* 11:36–55. DOI  
612 10.1080/15428052.2013.754296
- 613 Cambecèdes J, Garreta R (2017) The harvesting of wild plants: Exploitation of natural  
614 resources and conservation of a natural heritage. Available online:  
615 [https://alpha.jnsciences.org/agri-biotech/77-volume-spical-confrence-cirs-2017/483-the-  
616 harvesting-of-wild-plants-exploitation-of-natural-resources-and-conservation-of-a-  
617 natural-heritage.html](https://alpha.jnsciences.org/agri-biotech/77-volume-spical-confrence-cirs-2017/483-the-harvesting-of-wild-plants-exploitation-of-natural-resources-and-conservation-of-a-natural-heritage.html) (accessed on 19 July 2021)
- 618 Chaber L, Julliand C, Moreau D (2013) *Pré-étude du projet de charte nationale de  
619 cueillette professionnelle de plantes sauvages, premiers Éléments de Diagnostic*, AFC

- 620 Cunningham AB (2001) Applied ethnobotany: People, wild plant se and Conservation,  
621 Routledge, London
- 622 Filippi O, Aronson J (2011) Useful but potentially invasive plants in the Mediterranean  
623 region: What restrictions should be placed on their use in gardens? *BGjournal* 8:29–33.
- 624 Grasser S, Schunko C, Vogl CR (2012) Gathering “tea” – from necessity to  
625 connectedness with nature: Local knowledge about wild plant gathering in the  
626 Biosphere Reserve Grosses Walsertal (Austria). *J Ethnobiol Ethnomed* 8:31. DOI  
627 10.1186/1746-4269-8-31
- 628 Hamilton A (2005) Resource assessment for sustainable harvesting of medicinal plants.  
629 International Botanical Congress on Source to Shelf: Sustainable Supply Chain  
630 Management of Medicinal and Aromatic Plants, Vienna, p. 21-22.
- 631 Henriksen S, Hilmo O (eds.) (2015) Norsk rødliste for arter 2015. Artsdatabanken,  
632 Norway
- 633 Hermansen MET (2012) Creating terroir: An anthropological perspective on New  
634 Nordic Cuisine as an expression of Nordic identity. *Anthropol Food* S7. DOI  
635 10.4000/aof.7249
- 636 Høeg OA (1974) *Planter Og Tradisjon*, Universitetsforlaget, Oslo
- 637 International Society of Ethnobiology Code of Ethics (2008) Available online:  
638 [http://www.ethnobiology.net/what-we-do/core-programs/ise-ethics-program/code-of-](http://www.ethnobiology.net/what-we-do/core-programs/ise-ethics-program/code-of-ethics/code-in-english/)  
639 [ethics/code-in-english/](http://www.ethnobiology.net/what-we-do/core-programs/ise-ethics-program/code-of-ethics/code-in-english/) (accessed on 19 July 2021)
- 640 Landor-Yamagata JL, Kowarik I, Fischer LK (2018) Urban foraging in Berlin: People,  
641 plants and practices within the metropolitan green infrastructure. *Sustainability* 10:1873.  
642 DOI 10.3390/su10061873

- 643 Lovrić M, Da Re R, Vidale E, Prokofieva I, Wong J, Pettenella D, Verkerk PJ, Mavsar  
644 R (2020) Non-wood forest products in Europe – A quantitative overview. For Policy  
645 Econ 116:102175. DOI 10.1016/j.forpol.2020.102175
- 646 Łuczaj Ł, Pieroni A, Tardío J, Pardo de Santayana M, Sõukand R, Svanberg I, Kalle R  
647 (2012) Wild food plant use in 21st century Europe: The disappearance of old traditions  
648 and the search for new cuisines involving wild edibles. Acta- Soc Bot Pol 81:4. DOI  
649 10.5586/asbp.2012.031
- 650 Łuczaj Ł, Pieroni A (2016) Nutritional ethnobotany in Europe: From emergency foods  
651 to healthy folk cuisines and contemporary foraging trends. In: Sánchez-Mata M del C,  
652 Tardío J (eds) Mediterranean wild edible plants, Springer, New York, pp 33–56
- 653 Łuczaj Ł, Wilde M, Townsend L (2021) The ethnobiology of contemporary British  
654 foragers: Foods they teach, their Sources of inspiration and impact. Sustainability  
655 13:3478 DOI 10.3390/su13063478
- 656 Mathismoen O (2020) Ramsløksankere raserer naturreservater, Aftenposten, Oslo
- 657 McLain RJ, Hurley PT, Emery MR, Poe MR (2014) Gathering “Wild” food in the city:  
658 Rethinking the role of foraging in urban ecosystem planning and management. Local  
659 Environ. 19:220–240. DOI 10.1080/13549839.2013.841659
- 660 Mithril C, Dragsted LO, Meyer C, Blauert E, Holt MK, Astrup A (2012) Guidelines for  
661 the New Nordic Diet. Public Health Nutr 15:1941–1947 DOI  
662 10.1017/S136898001100351X
- 663 Nuñez M, Kuebbing S, Dimarco R, Simberloff D (2012) Invasive species: To eat or not  
664 to eat, that is the question. Conserv Lett 5:334–341. DOI 10.1111/j.1755-  
665 263X.2012.00250.x

- 666 O'Neill AR, Badola HK, Dhyani PP, Rana SK (2017) Integrating ethnobiological  
667 knowledge into biodiversity conservation in the Eastern Himalayas. *J Ethnobiol*  
668 *Ethnomed* 13:1. DOI 10.1186/s13002-017-0148-9
- 669 Pardo-de-Santayana M, Pieroni A, Puri RK (2010) The ethnobotany of Europe, past and  
670 present. In Pardo-de-Santayana M, Pieroni A, Puri RK, eds. *Ethnobotany of the New*  
671 *Europe, people, health, and wild plant resources*. Berghahn Books, Oxford, p 1–15
- 672 Poe MR, LeCompte J, McLain R, Hurley P (2014) Urban foraging and the relational  
673 ecologies of belonging. *Soc. Cult. Geogr* 15:901–919. DOI  
674 10.1080/14649365.2014.908232.
- 675 Pretty JN (1995) Participatory learning for sustainable agriculture. *World Dev* 23:1247–  
676 1263. DOI 10.1016/0305-750X(95)00046-F
- 677 Purzycki B, Jamieson-Lane A (2016) AnthroTools: An R package for cross-cultural  
678 ethnographic data analysis. *Cross-Cult Res* 51:51–74. DOI  
679 10.1177/1069397116680352.
- 680 Redford K, Richter B (2001) Conservation of biodiversity in a world of use. *Conserv*  
681 *Biol* 13:1246–1256. DOI 10.1046/j.1523-1739.1999.97463.x
- 682 Reyes-García V, Menendez-Baceta G, Aceituno-Mata L, Acosta-Naranjo R, Calvet-Mir  
683 L, Domínguez P, Garnatje T, Gómez-Baggethun E, Molina-Bustamante M, Molina M,  
684 Rodríguez-Franco R, Serrasolses G, Vallès J, Pardo-de-Santayana (2015) From famine  
685 foods to delicatessen: Interpreting trends in the use of wild edible plants through  
686 cultural ecosystem services. *Ecol Econ* 120:303–311. DOI  
687 10.1016/j.ecolecon.2015.11.003

688 Roskov Y, Ower G, Orrell T, Nicolson D, Bailly N, Kirk PM, Bourgoin T, DeWalt RE,  
689 Decock W, van Nieukerken E, Zarucchi J, Penev L, eds. (2019) Species 2000 & ITIS  
690 Catalogue of Life, 2019 Annual Checklist. Available online:  
691 <http://www.catalogueoflife.org/annual-checklist/2019/info/cite> (accessed on 20 July  
692 2021)

693 RStudio Team (2021) RStudio: Integrated Development for R. RStudio, Boston  
694 <http://www.rstudio.com/>

695 Sardeshpande M, Shackleton C (2020) Urban foraging: Land management policy,  
696 perspectives, and potential. PLOS ONE 15:e0230693. DOI  
697 10.1371/journal.pone.0230693

698 Schulp CJE, Thuiller W, Verburg PH (2014) Wild food in Europe: A synthesis of  
699 knowledge and data of terrestrial wild food as an ecosystem service. Ecol Econ  
700 105:292–305 DOI 10.1016/j.ecolecon.2014.06.018

701 Shumsky SA, Hickey GM, Pelletier B, Johns T (2014) Understanding the contribution  
702 of wild edible plants to rural social-ecological resilience in semi-arid Kenya. Ecol. Soc.  
703 19:4 DOI 10.5751/ES-06924-190434

704 Sloan P, Legrand W, Hindley C, eds (2015) The Routledge handbook of sustainable  
705 food and gastronomy, Routledge, London

706 Sõukand R, Kalle R, Fontefrancesco MF, Pieroni A (2021) Building a safety buffer for  
707 European food security: The role of small-scale food production and local ecological  
708 and gastronomic knowledge in Light of COVID-19. Open Res Eur 1:10. DOI  
709 10.12688/openreseurope.13138.1

- 710 Stano S (2018) Glocal food and transnational identities: The case of the Mediterranean  
711 diet. In Proceedings of the ASS Publications and International Semiotics Institute;  
712 Kaunas, 2018.
- 713 Statsforvaltaren i Troms og Finnmark (2019) Regler for multeplukking i nord.  
714 Available online: <https://www.statsforvalteren.no/nn/troms-finnmark/miljo-og-klima/friluftsliv/multeplukking/> (accessed on 21 July 2021)  
715
- 716 Teixidor-Toneu I, Kjesrud K, Bjerke E, Parekh K, Kool A (2020) From the “Norwegian  
717 Flora” (Eighteenth century) to “Plants and Tradition” (Twentieth century): 200 years of  
718 Norwegian knowledge about wild plants. *Econ Bot* 74:398–410 DOI 10.1007/s12231-  
719 020-09507-y
- 720 Teixidor-Toneu I, M’Sou S, Salamat H, Baskad HA, Illigh FA, Atyah T, Mouhdach H,  
721 Rankou H, Babahmad RA, Caruso E, Martin G, D’Ambrosio U (2021) Which plants  
722 matter? A comparison of academic and community assessments of plant value and  
723 conservation status in the Moroccan High Atlas. *Ambio*. DOI 10.1007/s13280-021-  
724 01584-0
- 725 Turner NJ, Łuczaj ŁJ, Migliorini P, Pieroni A, Dreon AL, Sacchetti LE, Paoletti MG  
726 (2011) Edible and tended wild plants, traditional ecological knowledge and  
727 agroecology. *Crit Rev Plant Sci* 30:198–225. DOI 10.1080/07352689.2011.554492
- 728 Ulian T, Diazgranados M, Pironon S, Padulosi S, Liu U, Davies L, Howes MR, Borrell  
729 JS, Ondo I, Pérez-Escobar OA, Sharrock S, Ryan P, Hunter D, Lee MA, Barstow C,  
730 Łuczaj Ł, Pieroni A, Cámara-Leret R, Noorani A, Mba C, Womdim RN, Muminjanov  
731 H, Antonelli A, Pritchard HW, Mattana E (2020) Unlocking plant resources to support  
732 food security and promote sustainable agriculture. *Plants People Planet* 2:421–445. DOI  
733 10.1002/ppp3.10145.

734 Vandebroek I, Balick MJ (2012) Globalization and loss of plant knowledge:  
 735 Challenging the paradigm. PLoS ONE 7:e37643. DOI 10.1371/journal.pone.0037643  
 736 Vorstenbosch T, Zwarte I, Duistermaat H, van Andel T (2017) Famine food of vegetal  
 737 origin consumed in the Netherlands during World War II. J Ethnobiol Ethnomed 13:63.  
 738 DOI 10.1186/s13002-017-0190-7  
 739 Waygood U (2019) Urban foraging: Its role in conservation and green space  
 740 management in London. University College London, London

741

742

743 **Tables**

744

745 **Table 1.** Most salient species harvested by plant part. The salience index value is  
 746 indicated in brackets.

| Fruits and berries                     | Leaves                                 | Flowers                                             | Stems and leaf stalks                               |
|----------------------------------------|----------------------------------------|-----------------------------------------------------|-----------------------------------------------------|
| <i>Vaccinium myrtillus</i> L.(0.76)    | <i>Urtica dioica</i> (0.43)            | <i>Chamaenerion angustifolium</i> (L.) Schur (0.33) | <i>Chamaenerion angustifolium</i> (L.) Schur (0.38) |
| <i>Rubus idaeus</i> L. (0.46)          | <i>Allium ursinum</i> L. (0.36)        | <i>Filipendula ulmaria</i> (L.) Maxim. (0.32)       | <i>Matteuccia struthiopteris</i> (L.) Tod. (0.17)   |
| <i>Vaccinium vitis-idaea</i> L. (0.45) | <i>Aegopodium podagraria</i> L. (0.25) | <i>Taraxacum sp.</i> (0.31)                         | <i>Angelica archangelica</i> L. (0.14)              |
| <i>Rubus chamaemorus</i> L. (0.31)     | <i>Taraxacum sp.</i> (0.20)            |                                                     | <i>Rheum rhabarbarum</i> L. (0.10)                  |
| <i>Fragaria vesca</i> L. (0.26)        |                                        |                                                     |                                                     |

747

748 **Table 2.** List of alien WEP with identified sustainability issues due to potential  
 749 invasiveness. Invasiveness classification coding follows *Artsdatabanken* (2020). Severe  
 750 impact = SE; High impact = HI; Potentially high impact = PH; Low impact = LO

751

| Species                                                | Invasiveness classification | Score | Parts harvested (NR)     | Sustainability issues                                                                       |
|--------------------------------------------------------|-----------------------------|-------|--------------------------|---------------------------------------------------------------------------------------------|
| <i>Barbarea vulgaris</i> W. T. Aiton                   | SE                          | O     | Flowers (10), leaves (8) | Seeds could be spread while foraging, but foraging the flowers reduces the spread of seeds. |
| <i>Aronia melanocarpa</i> (Michx.) Elliott             | LO                          | O     | Fruits (17)              | As fruits are harvested, foraging may contribute to spreading the seeds                     |
| <i>Armoracia rusticana</i> P.Gaertn., B.Mey. & Scherb. | HI                          | O     | Leaves (2), rhizomes (4) | Rhizome cuttings made while foraging may contribute to spreading this species               |

752

753 **Table 3.** List of native WEP with identified sustainability issues due to harvesting of  
 754 threatened species or potential overharvesting. Conservation classification coding  
 755 follows *Artsdatabanken* (Henriksen and Hilmo 2015). LC = Least Concern; NT = Near  
 756 Threatened; VU = Vulnerable

| Species                      | Conservation threat classification | Score | Parts harvested (NR)      | Sustainability issues                                                |
|------------------------------|------------------------------------|-------|---------------------------|----------------------------------------------------------------------|
| <i>Allium ursinum</i> L.     | LC                                 | O     | Flowers (30), leaves (92) | Localized overharvesting has been documented                         |
| <i>Polypodium vulgare</i> L. | LC                                 | O     | Roots (19)                | Popular roots, foraging can be very detrimental to plant communities |



---

|                                   |    |    |                                     |                                                                                                    |
|-----------------------------------|----|----|-------------------------------------|----------------------------------------------------------------------------------------------------|
| <i>Malus sylvestris</i> (L.)      | VU | R* | Fruits (5), flowers (2), leaves (1) | Vulnerable species, however foragers probably harvest hybrids                                      |
| Mill.                             |    |    |                                     |                                                                                                    |
| <i>Ulmus glabra</i> Huds.         | VU | R* | Fruits (10), leaves (1)             | Vulnerable species, but foraging its fruits is not likely to have any major impact                 |
| <i>Peucedanum ostruthium</i> (L.) | NT | R  | Leaves (1), roots (1)               | The species is near threatened, yet likely introduced before 1800, and roots should not be foraged |
| Koch                              |    |    |                                     |                                                                                                    |
| <i>Meum athamanticum</i>          | VU | R  | Leaves (1), seeds (1)               | The species is threatened, yet likely introduced before 1800, and should not be foraged            |
| Jacq.                             |    |    |                                     |                                                                                                    |
| <i>Valeriana officinalis</i>      | NT | R  | Roots (2)                           | The species is near threatened, yet likely introduced before 1800, and roots should not be foraged |
| L.                                |    |    |                                     |                                                                                                    |

---

757

758

759 **Figure legends**

760 **Figure 1.** Map of Norway showing the number of informants interviewed and that  
 761 responded to the online questionnaire per region. Basic socio-demographic information  
 762 on interviewed informants is included.

763 **Figure 2.** Decision flow-chart to categorize conservation pressure on WEPs according  
 764 to foraging activity.

765

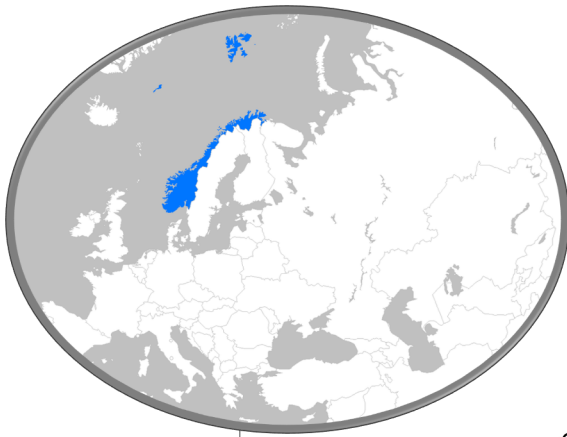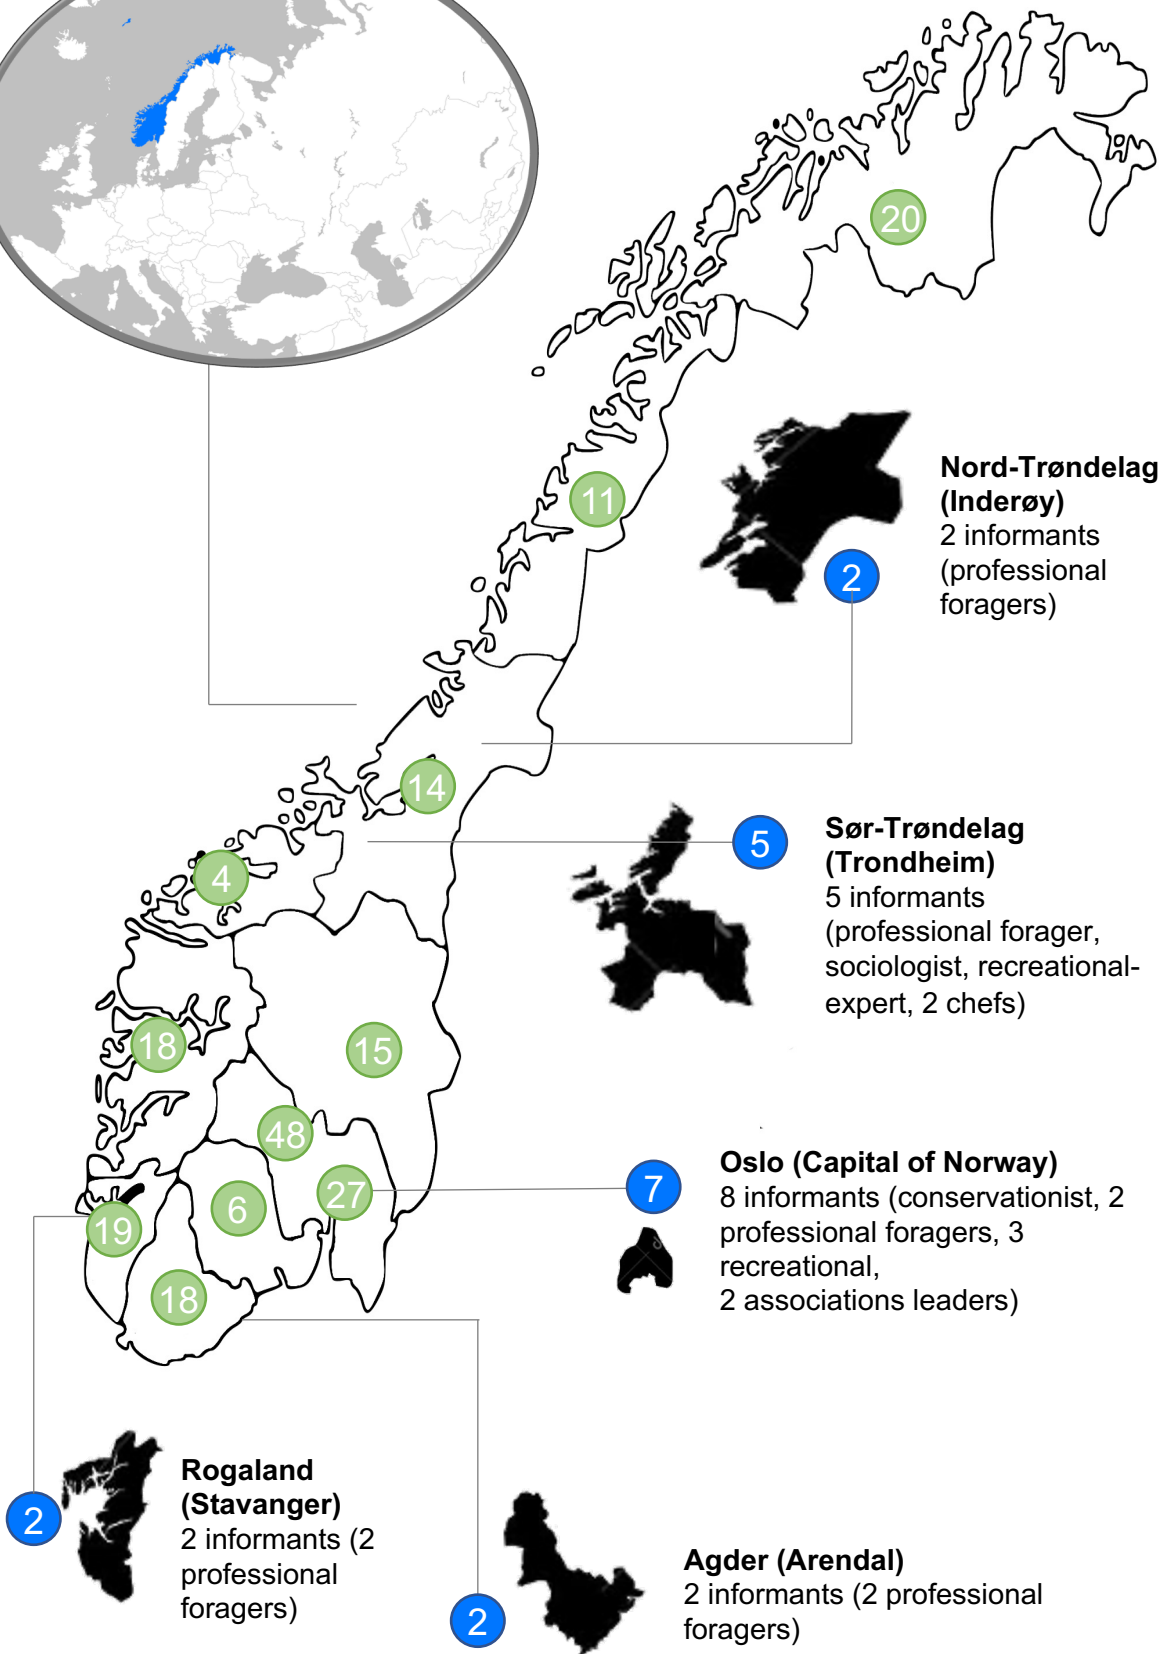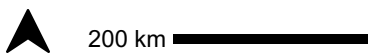

# Foraged wild edible plants in Norway

Alien

Native

Is it invasive?

Is it threatened?

Yes

No

No

Potentially, vernacular names can correspond to many species including threatened ones

Yes

Alien invasive

Alien

Plant part(s) harvested damaging individuals survival?

Plant part(s) harvested reproductive?

No

No

Yes

Yes

Importance & risk of spread?

Taxonomic issues

Importance and/or extinction risk?

High popularity and high risk of spread

High popularity or high risk of spread

Low

High

R

O

G\*

G

G\*

O

R

Advice

do not collect

Advice

collect with great care (e.g. seeds should not be composted)

Advice

feel free to collect

Advice

collect once species-level identification ensured

Advice

collect once species-level identification ensured **and** consider plant reproductive capacities (e.g. enough seeds left on site)

Advice

do not collect
